# Supplementary material
Source: HighWire-hosted journal article supplement (https://bmjopengastro.bmj.com/content/4/1/e000164)
Supplement: inline-supplementary-material-1 [file inline-supplementary-material-1.xlsx]

## Sheet: Sheet1
INTOLERANT FOOD	1° Substitution	2° Substitution	3° Substitution	4° Substitution	5° Substitution
Acorn squash	Pumpkin	Butternut squash
Almond	Peanut	Walnut	Pecan
Amaranth	Quinoa
Anchovy	Sardine
Apple	Pear	Kiwi	Banana
Apricot	Plum	Nectarine	Peach
Artichoke	Bok choy
Asparagus	Broccoli	Artichoke
Avocado	Olive	Peach	Mango
Baker's yeast	Brewer's yeast	Malt	Tapioca	Mushroom (button/white)
Banana	Apple	Grape	Pear	Kiwi
Barley	Quinoa	Millet	Sorghum
Basil	Oregano	Bay leaf	Rosemary	Thyme
Bay leaf	Sage	Oregano	Parsley
Beef	Chicken	Veal
Bell pepper mix	Jalapeno pepper
Bison	Veal
Black beans	Pinto bean
Black currant	Date
Black-eyed pea	Green pea
Black pepper	Cinnamon	Cumin	Cayenne pepper
Black/Green Tea	Chamomile tea	Coffee	Ginger	Clove
Blackberry	Raspberry	Blueberry
Blueberry	Strawberry	Raspberry	Cranberry	Blackberry
Bok Choy	Artichoke
Brazil nut	Pine nut
Brewer's yeast	Baker's yeast	Hops	Barley
Broccoli	Cauliflower	Swiss chard
Brussels sprout	Cabbage	Cauliflower
Buckwheat	Millet	Psyllium
Butternut squash	Acorn squash	Zucchini squash
Cabbage	Brussel sprouts	Kelp
Candida albicans
Cane sugar	Maple sugar	Honey	Fig	Date
Canola oil	Olive	Cottonseed
Canteloupe	Honeydew	Watermelon	Pineapple
Caraway	Cardamom	Carob
Cardamom	Caraway	Coriander
Carob	Hazelnut
Carrot	Celery
Casein	Soybean
Cashew	Walnut	Brazil nut
Catfish	Trout
Cauliflower	Broccoli	Brussels sprouts
Cayenne pepper	Chili pepper
Celery	Carrot
Chamomile	Black/Green Tea	Carob / Coffee	Ginger	Clove
Cherry	Grape	Tomato
Chicken	Beef	Turkey
Chicken Liver	Veal	Duck
Chickpea	Lentil bean	Pinto bean	Kidney bean
Chili pepper	Cayenne pepper
Cilantro	Parsley	Peppermint
Cinnamon	Ginger	Nutmeg
Clam	Oyster
Clove	Cinnamon	Cayenne pepper	Ginger
Cocoa	Vanilla	Carob
Coconut	Macadamia nut
Codfish	Sole
Coffee	Black/Green Tea	Carob
Coriander	Saffron	Caraway
Corn	Tomato	Chickpea
Cottonseed	Sunflower	Canola oil	Safflower
Cow's milk	Goat's milk	Egg yolk	Veal	Pork
Crab	Lobster
Cranberry	Raspberry	Blackberry	Blueberry
Cucumber	Zucchini	Yellow squash	Butternut squash	Bell pepper
Cumin	Chili pepper
Date	Fig
Dill	Parsley	Cilantro
Duck	Venison
Eggplant	Okra	Artichoke
Egg white	Tuna	Chicken liver
Egg yolk	Tuna
Endive	Watercress
Fava bean	Lima bean	Kidney bean	Black bean
Fennel seed	Mustard seed	Caraway
Fig	Date
Flaxseed	Caraway	Fennel seed
Flounder	Haddock
Fructose (HFCS)	Cane sugar	Maple sugar	Honey	Date	Strawberry
Garlic	Onion	Leek
Ginger	Cinnamon	Clove	Licorice	Black pepper	Cardamom
Gluten/Gliaden
Goat's milk	Cow's milk	Egg yolk	Lamb	Chicken
Grape	Cherry	Tomato	Cantaloupe	Pear
Grapefruit	Lemon	Orange
Green Pea	Black-eyed pea	Black bean
Haddock	Flounder
Halibut	Tilapia
Hazelnut	Macadamia
Honey	Maple sugar	Fructose (HFCS)	Watermelon	Nectarine
Honeydew melon	Canteloupe	Watermelon	Papaya	Pineapple
Hops	Brewer's yeast	Psyllium	Corn
Iceberg lettuce	Red/Green leaf lettuce	Watercress
Jalapeno pepper	Bell pepper
Kale	Spinach
Kelp	Swiss chard
Kidney bean	Fava bean
Kiwi	Pineapple	Banana	Papaya
Lamb	Bison
Leek	Scallion	Onion
Lemon	Lime
Lentil bean	Chickpea	Navy bean
Licorice	Clove	Peppermint	Black pepper
Lima bean	Fava bean	Pinto bean
Lime	Lemon
Lobster	Crab
Macadamia nut	Hazelnut
Mackerel	Mahi mahi
Mahi mahi	Tilapia
Malt	Hops	Amaranth	Sorghum
Mango	Papaya
Maple sugar	Cane sugar	Fructose (HFCS) / Honeydew melon	Cherry	Nectarine
Millet	Buckwheat	Soybean	Spelt
Mung bean	Lentil bean
Mushroom (button/white)	Portobello mushrooom
Mussel	Clam
Mustard seed	Fennel seed	Flaxseed
Navy bean	Pinto bean	Mung bean
Nectarine	Plum	Apricot	Peach	Kiwi
Nutmeg	Cinnamon	Peppermint	Cardamom	Carob
Oat	Wheat	Millet	Corn
Okra	Eggplant	Cucumber
Olive	Avocado	Mango	Coconut
Onion	Garlic	Scallions
Orange	Lemon	Lime	Grapefruit
Oregano	Parsley	Basil	Cilantro	Sage	Dill
Oyster	Clam	Scallop
Papaya	Mango
Paprika	Sage	Thyme
Parsley	Cilantro	Bay leaf	Peppermint
Parsnip	Turnip	Radish
Peach	Nectarine	Apricot	Plum	Kiwi
Peanut	Almond	Pecan	Brazil nut
Pear	Apple	Banana / Cantaloupe	Tomato	Apricot
Pecan	Walnut	Brazil nut
Peppermint	Ginger	Licorice
Pine nut	Sesame	Pistachio	Flaxseed
PIneapple	Kiwi	Mango	Pomegranate
Pinto bean	Black bean
Pistachio	Almond	Hazelnut
Plum	Apricot	Peach
Pomegranate	Cranberry	Plum
Pork	Turkey	Duck
Portobello mushroom	Mushroom (button/white)
Psyllium	Flaxseed
Pumpkin	Squash (yellow)	Sweet potato
Quinoa	Amaranth
Radish	Turnip	Parsnip
Raspberry	Blackberry	Blueberry	Cranberry	Watermelon
Red beet	Radish	Fig
Red/Green leaf lettuce	Iceberg lettuce	Romaine lettuce
Rice (brown/white)	Wild rice
Romaine lettuce	Red/Green leaf lettuce	Spinach
Rosemary	Oregano	Dill	Basil
Rye	Barley	Sorghum	Caraway	Wild rice
Safflower	Sunflower	Canola oil / Walnut	Flaxseed
Saffron	Coriander	Turmeric
Sage	Bay leaf	Rosemary	Thyme	Turmeric
Salmon	Tuna	Snapper
Sardine / Herring	Anchovy
Scallions	Onion	Leek	Garlic
Scallop	Clam
Sea Bass	Snapper
Sesame	Pine nut	Caraway	Flaxseed
Shrimp	Crab	Scallop
Snapper	Sea bass
Sole	Codfish
Sorghum	Tapioca
Soybean	Chickpea	Pinto bean	Kidney bean
Spelt	Buckwheat	Tapioca	Wild rice (C42)
Spinach	Kale
Squash (yellow)	Zuchinni squash	Eggplant	Butternut squash
Squid	Swordfish	Scallop
Strawberry	Blueberry	Blackberry	Cherry
String bean	Green pea	Okra
Sunflower	Safflower
Sweet potato	White potato	Wild rice
Swiss chard	Kelp
Swordfish	Squid	Mahi mahi
Tapioca	Sorghum	Red beet
Teff	Amaranth
Thyme	Turmeric
Tilapia	Mahi mahi	Halibut
Tomato	Corn	Banana
Trout	Catfish
Tuna	Salmon	Sea bass
Turkey	Pork	Duck
Turmeric	Thyme	Ginger	Saffron
Turnip	Parsnip	Sweet potato
Vanilla	Cocoa	Almond	Hazelnut
Veal	Bison
Venison	Duck
Walnut	Pecan	Cashew
Watercress	Endive
Watermelon	Canteloupe	Mango
Wheat	Oat	Buckwheat	Tapioca	Rice
Whey	Soybean
White potato	Sweet potato	Rice
Wild rice	Rice
Zucchini	Squash (yellow)	Acorn squash	Asparagus
Revision History
Created: 07/03/14
Rev-1 07/23/14: Ascending order; added secondary and tertiary food substitutions
Rev-2 07/28/14: Added secondary, tertiary and quaternary food substitutions
Rev-3 08/13/14: Added secondary, tertiary and quaternary food substitutions
Rev-4 09/04/14: Added secondary, tertiary and quaternary food substitutions
Rev-5 09/29/14: Added secondary, tertiary and quaternary food substitutions
Rev-6 10/13/14: Added 2 secondary food subst; replaced coffee with flaxseed as a primary substitution for psyllium
Rev-7 10/21/14: Added secondary, tertiary and quaternary food substitutions
Rev-8 11/03/14: Added secondary and tertiary food substitutions
Rev-9 11/11/14: Added secondary, tertiary and quaternary food substitutions
Rev-10 11/18/14: Added secondary and tertiary food substitutions
Rev-11 12/08/14: Added secondary, tertiary, quaternary and 1st quinary food substitutions
Rev-12 01/13/14: Added 3 secondary food substitutions
Rev-13 01/29/15: Added secondary, tertiary and quaternary food substitutions
Rev-14 03/02/14: Added 5 secondary food substitutions
Rev-15 05/13/15: Added secondary, tertiary and quaternary food substitutions
Rev-16 05/19/15: Added secondary, tertiary, quaternary, quinary food substitutions
Rev-17 06/30/15: Added 3 secondary food substitutions
Rev-18 07/06/15: Added secondary, tertiary and quaternary food substitutions
Rev-19 08/20/15: Added secondary and tertiary food substitutions
Rev-20 08/27/15: Added 3 tertiary and 1 quaternary food substitutions
Rev-21 09/19/15: Added 1 secondary and 1 quaternary food substitutions
Rev-22 11/13/15: Added secondary, quaternary and quinary food substitutions. CSS added new food (teff); primary substitution made.
